# Supplementary material for: The Prognostic Significance of Diabetes and Microvascular Complications in Patients With Heart Failure With Preserved Ejection Fraction
Source: Oxford University Press journal article supplement (doi:10.2337/dc17-0755), 2017-10-19
Supplement: dc170755supplementarydata.pdf [file dc170755supplementarydata.pdf]

SUPPLEMENTARY DATA

**Supplementary Table 1. Risk of Hospitalization and Death with Diabetes across Number of Microvascular Complications (N=1,091)**

| Outcome                                   | Events/No. at risk | Model 1* HR(95%CI) | P-value | Model 2† HR(95%CI) | P-value | Model 3‡ HR(95%CI) | P-value | P-trend§ |
|-------------------------------------------|--------------------|--------------------|---------|--------------------|---------|--------------------|---------|----------|
| <i>Hospitalization</i>                    |                    |                    |         |                    |         |                    |         |          |
| Diabetes + No microvascular complications | 388/742            | Ref                | -       | Ref                | -       | Ref                | -       | <0.001   |
| Diabetes + 1 microvascular complication   | 140/212            | 1.52 (1.25, 1.85)  | <0.001  | 1.29 (1.05, 1.58)  | 0.016   | 1.29 (1.05, 1.58)  | 0.015   |          |
| Diabetes + ≥2 microvascular complications | 100/137            | 1.80 (1.44, 2.25)  | <0.001  | 1.57 (1.23, 1.99)  | <0.001  | 1.56 (1.23, 1.99)  | <0.001  |          |
| <i>Hospitalization for Heart Failure</i>  |                    |                    |         |                    |         |                    |         |          |
| Diabetes + No microvascular complications | 134/742            | Ref                | -       | Ref                | -       | Ref                | -       | 0.0063   |
| Diabetes + 1 microvascular complication   | 59/212             | 1.67 (1.23, 2.27)  | 0.0011  | 1.20 (0.87, 1.65)  | 0.28    | 1.20 (0.87, 1.66)  | 0.26    |          |
| Diabetes + ≥2 microvascular complications | 47/137             | 2.15 (1.54, 3.01)  | <0.001  | 1.63 (1.13, 2.34)  | 0.0084  | 1.61 (1.12, 2.32)  | 0.0097  |          |
| <i>Death</i>                              |                    |                    |         |                    |         |                    |         |          |
| Diabetes + No microvascular complications | 128/742            | Ref                | -       | Ref                | -       | Ref                | -       | 0.037    |
| Diabetes + 1 microvascular complication   | 50/212             | 1.46 (1.05, 2.03)  | 0.024   | 1.24 (0.88, 1.75)  | 0.22    | 1.24 (0.88, 1.75)  | 0.022   |          |
| Diabetes + ≥2 microvascular complications | 40/137             | 1.81 (1.27, 2.59)  | 0.0011  | 1.49 (1.01, 2.19)  | 0.042   | 1.49 (1.01, 2.19)  | 0.042   |          |
| <i>Cardiovascular Death</i>               |                    |                    |         |                    |         |                    |         |          |
| Diabetes + No microvascular complications | 79/742             | Ref                | -       | Ref                | -       | Ref                | -       | 0.45     |
| Diabetes + 1 microvascular complication   | 32/212             | 1.51 (0.99, 2.28)  | 0.051   | 1.31 (0.85, 2.02)  | 0.23    | 1.31 (0.85, 2.02)  | 0.28    |          |
| Diabetes + ≥2 microvascular complications | 21/137             | 1.54 (0.95, 2.50)  | 0.079   | 1.27 (0.76, 2.14)  | 0.36    | 1.28 (0.76, 2.14)  | 0.36    |          |

\*Adjusted for age, sex, and race.

†Adjusted for Model 1 covariates plus smoking, systolic blood pressure, serum creatinine, body mass index, aspirin, angiotensin-converting enzyme inhibitors/angiotensin II receptor blockers, beta blockers, statin, randomization group, New York Heart Association Class, coronary heart disease, stroke, prior heart failure hospitalization, insulin, duration of diabetes, and hemoglobin.

‡Adjusted for Model 2 covariates plus urine albumin/creatinine ratio.

§Represents the P-trend across number of microvascular complications. Computed using Model 2 covariates.

CI=confidence interval; HR=hazard ratio.
